# Supplementary material
Source: publisher figshare collection journal article supplement (https://tandf.figshare.com/articles/dataset/_/12496880)
Supplement: Supplementary file 1 [file 1]

Archive with 8 entries (8 files):
- Figure_S1.png
- Figure_S2.png
- Figure_S3.png
- Figure_S4.png
- Figure_S5.emf
- Figure_S6.emf
- Supplementary_Informations.docx
- Supplementary_Informations.pdf
