# Supplementary material
Source: publisher figshare collection journal article supplement (https://tandf.figshare.com/articles/dataset/_/12496880)
Supplement: Supplementary file 1 [file 1 › Supplementary_Informations.docx]

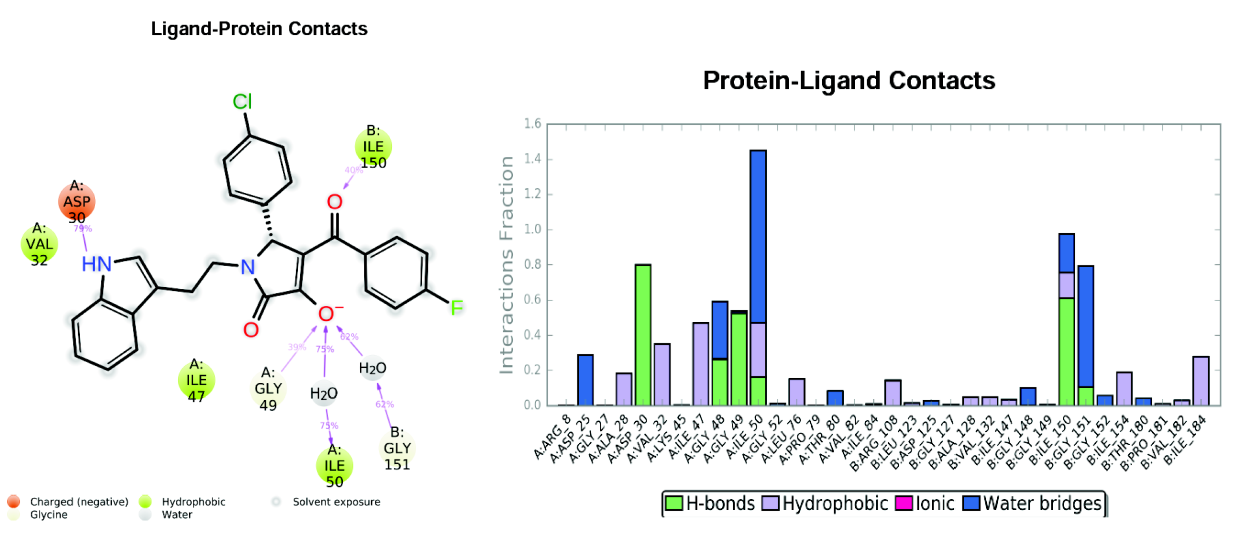


**Figure S1:** Ligand interaction diagrams of compound 287 throughout molecular dynamics simulations


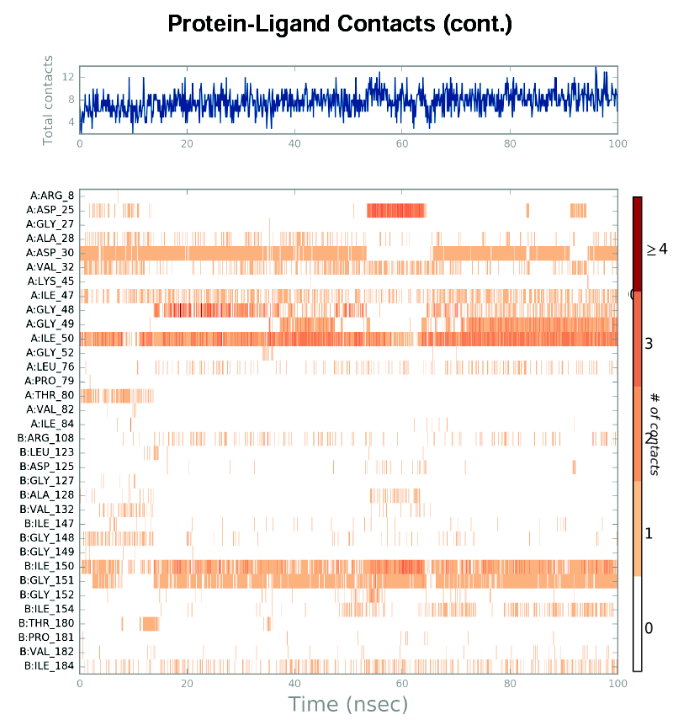


**Figure S2:** Protein ligand interactions graph of compound 287 throughout the simulations.


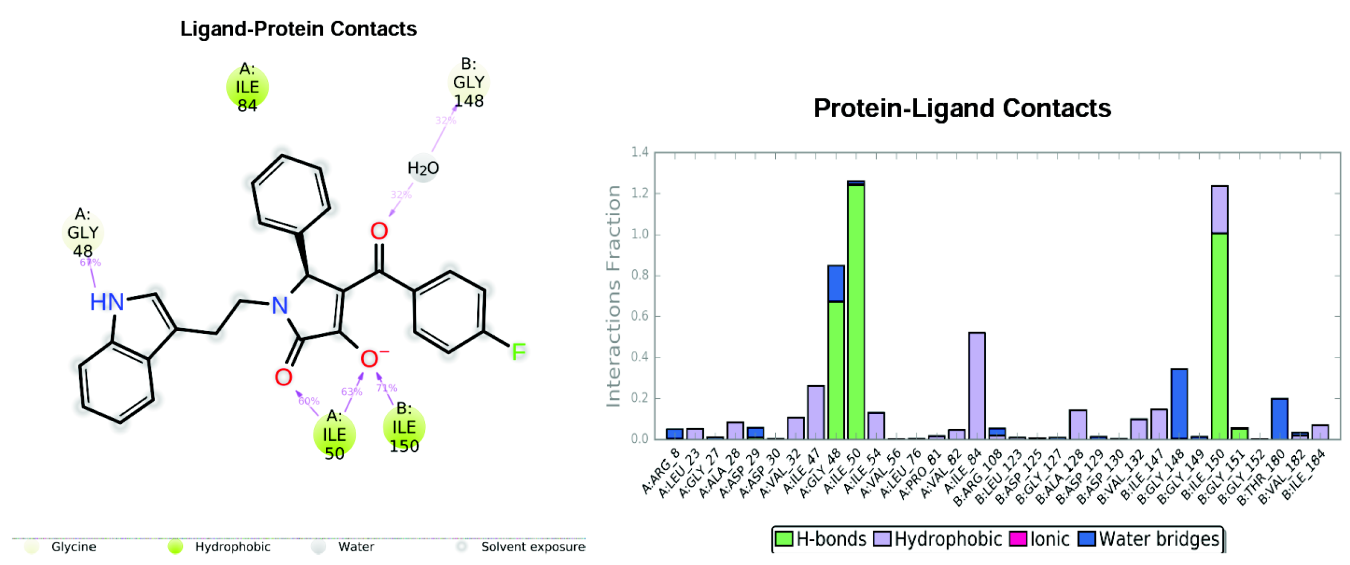


**Figure S3:** Ligand interaction diagrams of compound 338 throughout molecular dynamics simulations


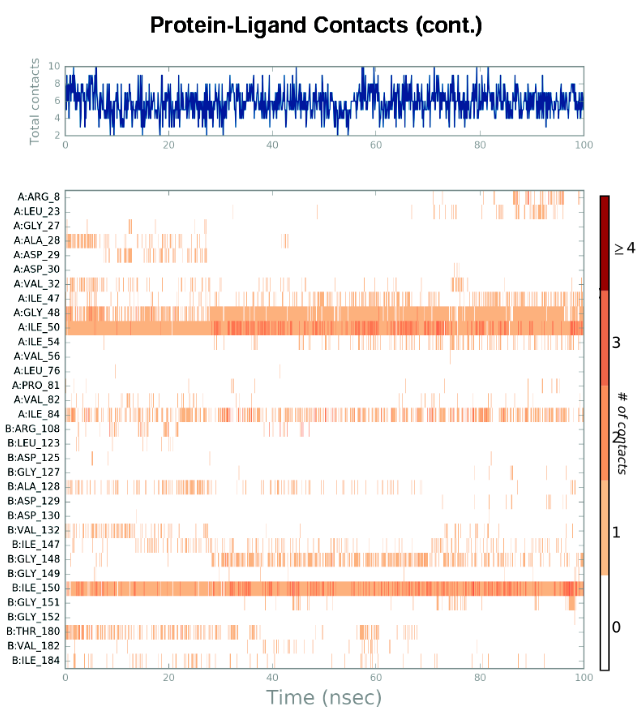


**Figure S4:** Protein ligand interactions graph of compound 338 throughout the simulations.

**Figure S5:** First MM/GBSA free energy analysis for the studied molecules at the binding pocket of HIV-1 PR throughout the 100 ns MD simulations. (MM/GBSA binding energy values in kcal/mol)

**Figure S6:** Second MM/GBSA free energy analysis for the studied molecules at the binding pocket of HIV-1 PR throughout the 100 ns MD simulations. (MM/GBSA binding energy values in kcal/mol)

**Table S1:** 2D structures, average MM/GBSA scores of selected 5 hits and FDA approved drug Amprenavir.

| Mol_Number | 2D Structure | **MM/GBSA (First MD)**  **(kcal/mol)** | **MM/GBSA (Second MD)**  **(kcal/mol)** |
| --- | --- | --- | --- |
| Mol-25 | 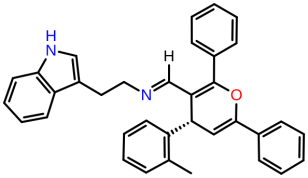 | 69.459±4.639 | 68.629±4.771 |
| Mol-287 | 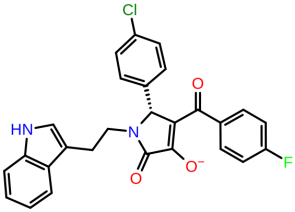 | 56.456±7.517 | 57.725±6.806 |
| Mol-290 | 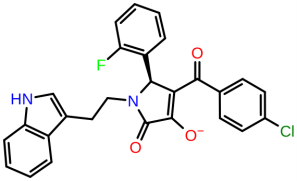 | 57.805±3.870 | 58.015±3.952 |
| Mol-315 | 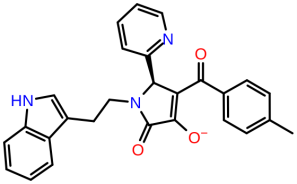 | 52.609±5.623 | 50.252±5.950 |
| Mol-338 | 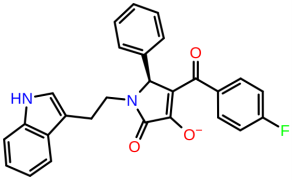 | 52.022±4.370 | 52.650±4.069 |
| Amprenavir | 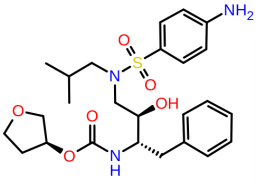 | 78.642±4.787 | 79.026±4.637 |
