# Supplementary material
Source: publisher figshare collection journal article supplement (https://tandf.figshare.com/articles/dataset/_/12496880)
Supplement: Supplementary file 1 [file 1 › Supplementary_Informations.pdf]

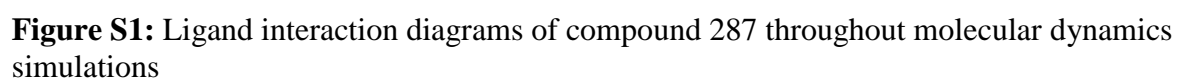

**Figure S1:** Ligand interaction diagrams of compound 287 throughout molecular dynamics simulations

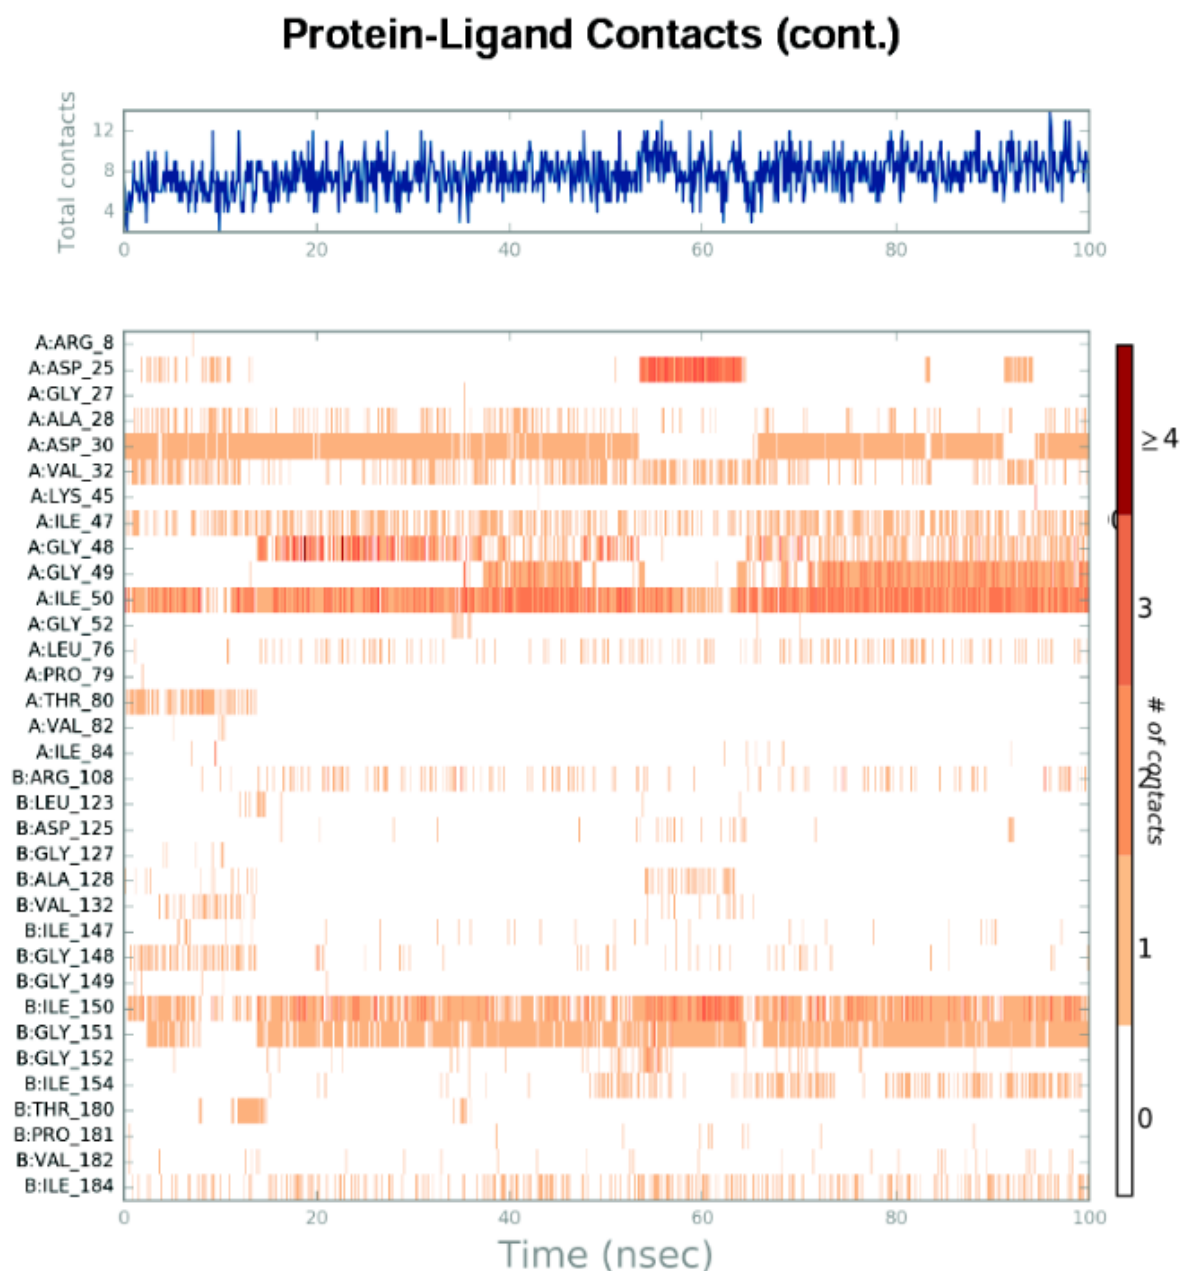

**Figure S2:** Protein ligand interactions graph of compound 287 throughout the simulations.

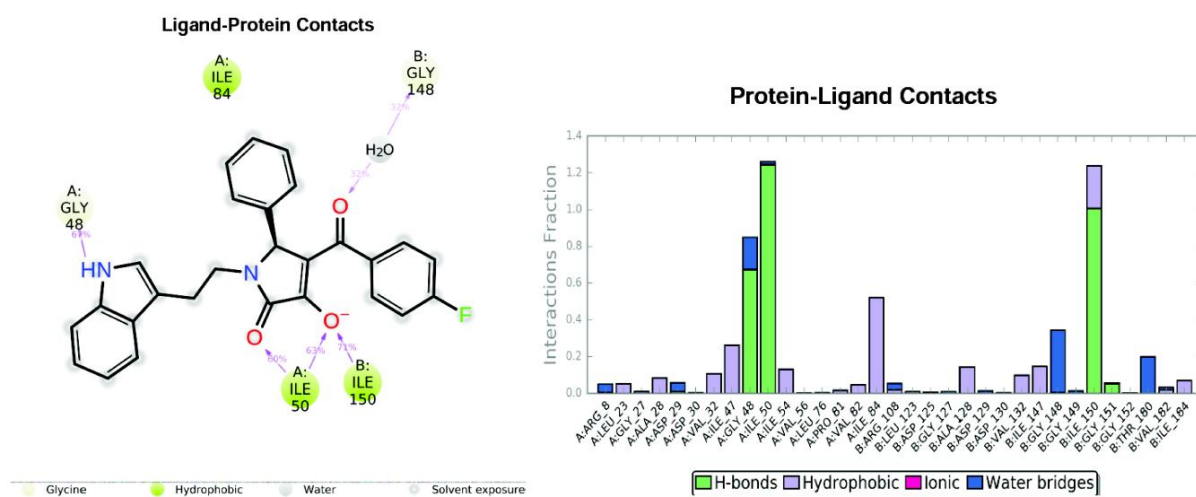

**Figure S3:** Ligand interaction diagrams of compound 338 throughout molecular dynamics simulations

## Protein-Ligand Contacts (cont.)

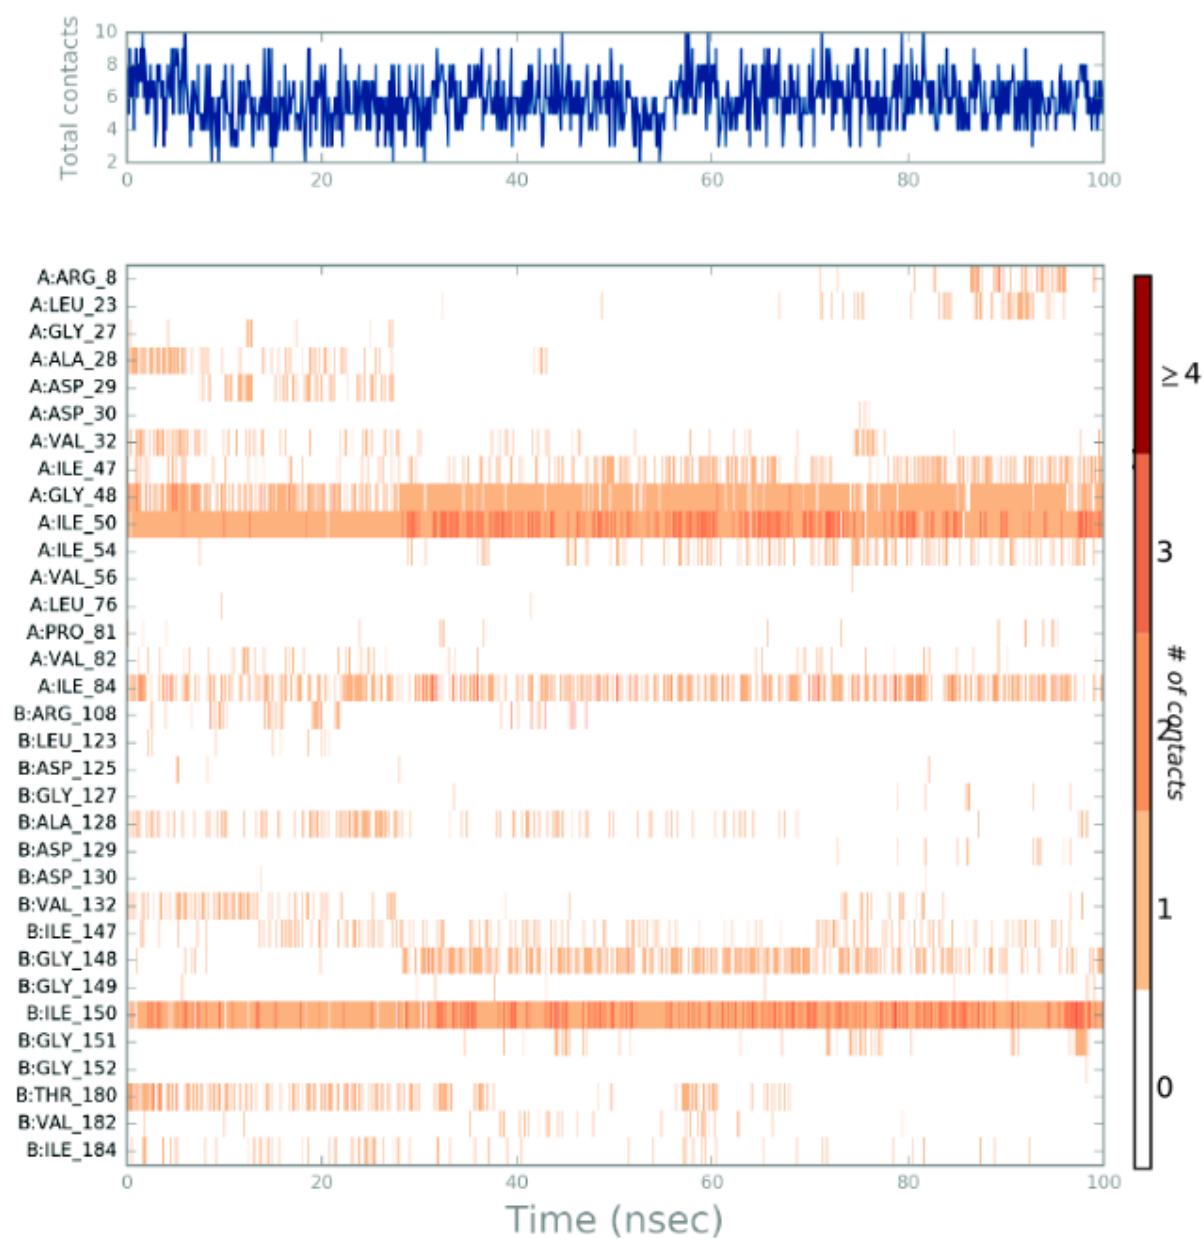

**Figure S4:** Protein ligand interactions graph of compound 338 throughout the simulations.

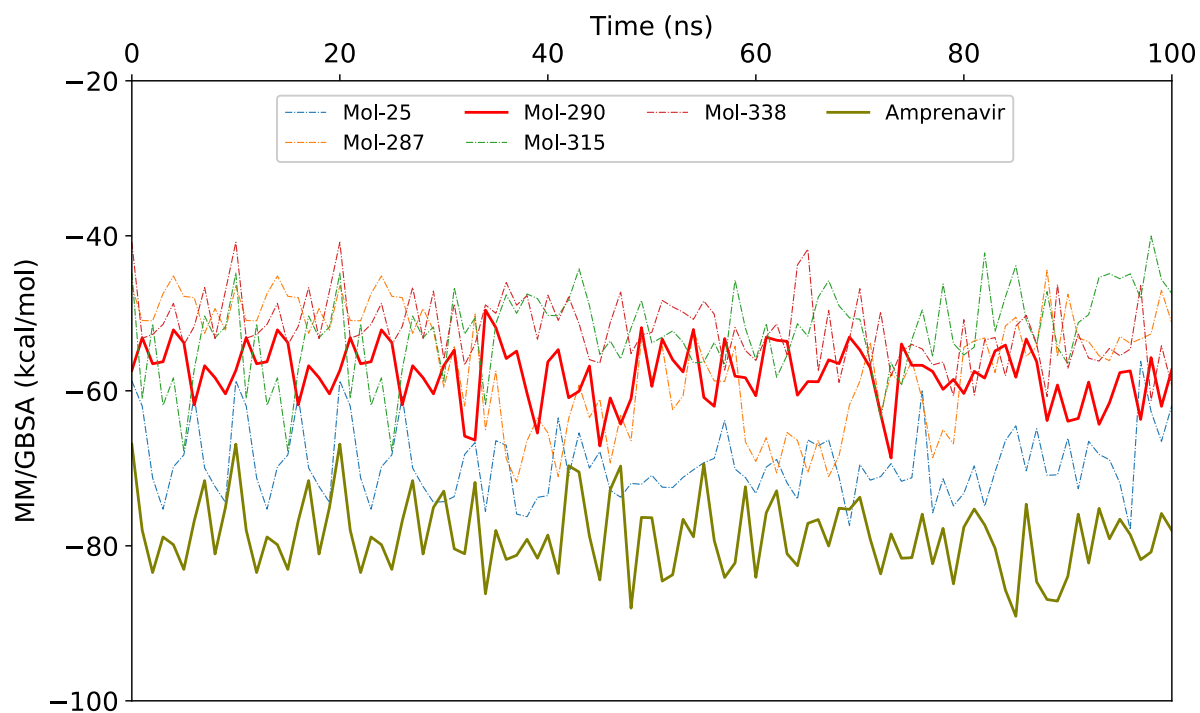

**Figure S5:** First MM/GBSA free energy analysis for the studied molecules at the binding pocket of HIV-1 PR throughout the 100 ns MD simulations. (MM/GBSA binding energy values in kcal/mol)

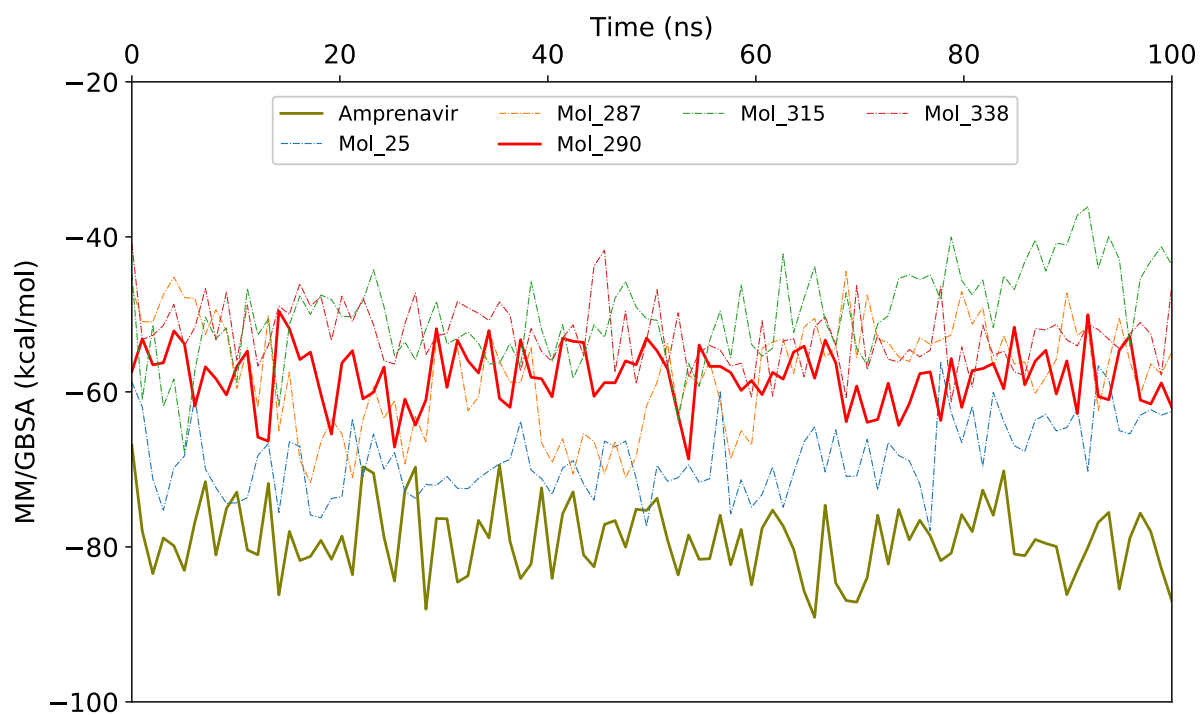

**Figure S6:** Second MM/GBSA free energy analysis for the studied molecules at the binding pocket of HIV-1 PR throughout the 100 ns MD simulations. (MM/GBSA binding energy values in kcal/mol)

**Table S1:** 2D structures, average MM/GBSA scores of selected 5 hits and FDA approved drug Amprenavir.

| Mol_Number | 2D Structure                                                                        | MM/GBSA<br>(First MD)<br>(kcal/mol) | MM/GBSA<br>(Second MD)<br>(kcal/mol) |
|------------|-------------------------------------------------------------------------------------|-------------------------------------|--------------------------------------|
| Mol-25     | 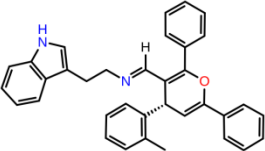   | 69.459±4.639                        | 68.629±4.771                         |
| Mol-287    | 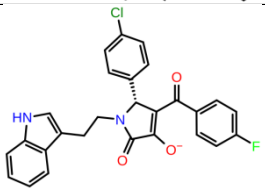   | 56.456±7.517                        | 57.725±6.806                         |
| Mol-290    | 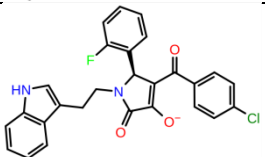   | 57.805±3.870                        | 58.015±3.952                         |
| Mol-315    | 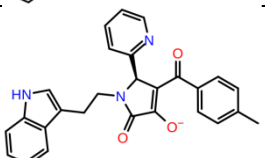  | 52.609±5.623                        | 50.252±5.950                         |
| Mol-338    | 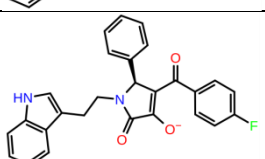 | 52.022±4.370                        | 52.650±4.069                         |
| Amprenavir | 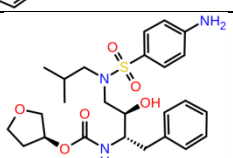 | 78.642±4.787                        | 79.026±4.637                         |
