# Supplementary material
Source: publisher figshare collection journal article supplement (https://tandf.figshare.com/articles/dataset/_/12496880)

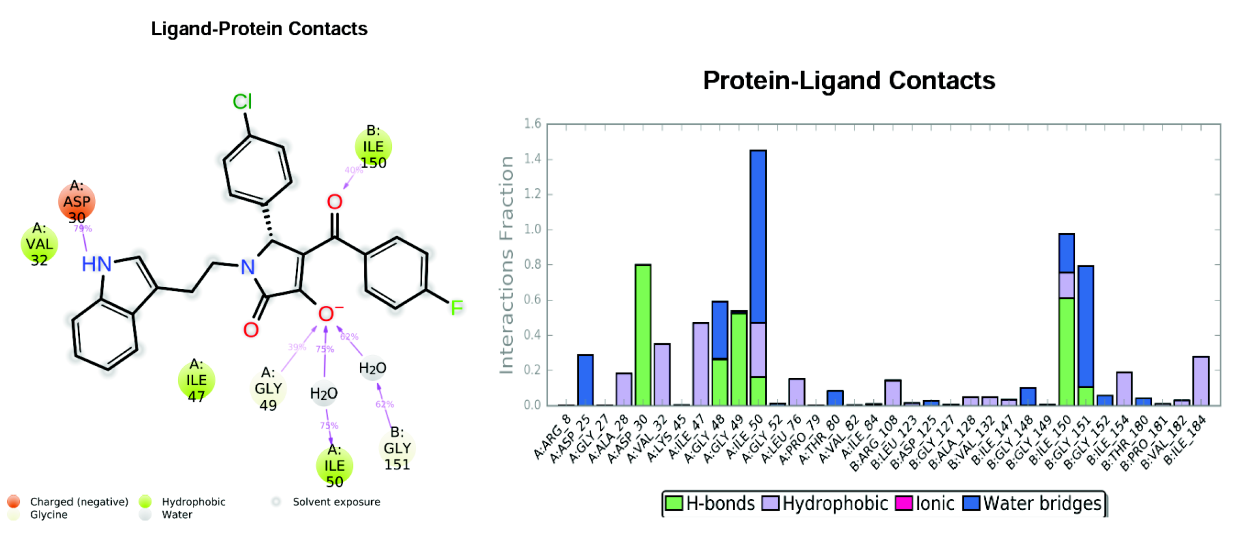

Supplement: Supplementary file 1 [file 1 › Figure_S1.png]

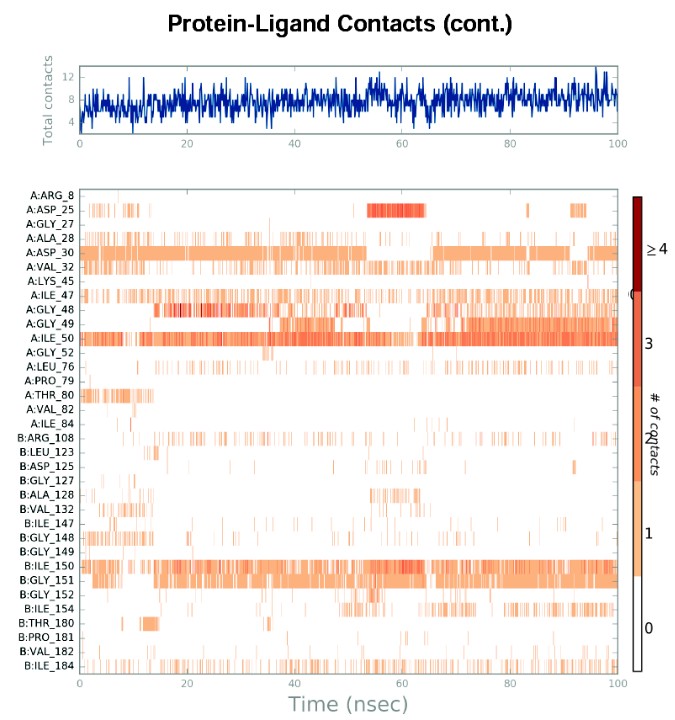

Supplement: Supplementary file 1 [file 1 › Figure_S2.png]

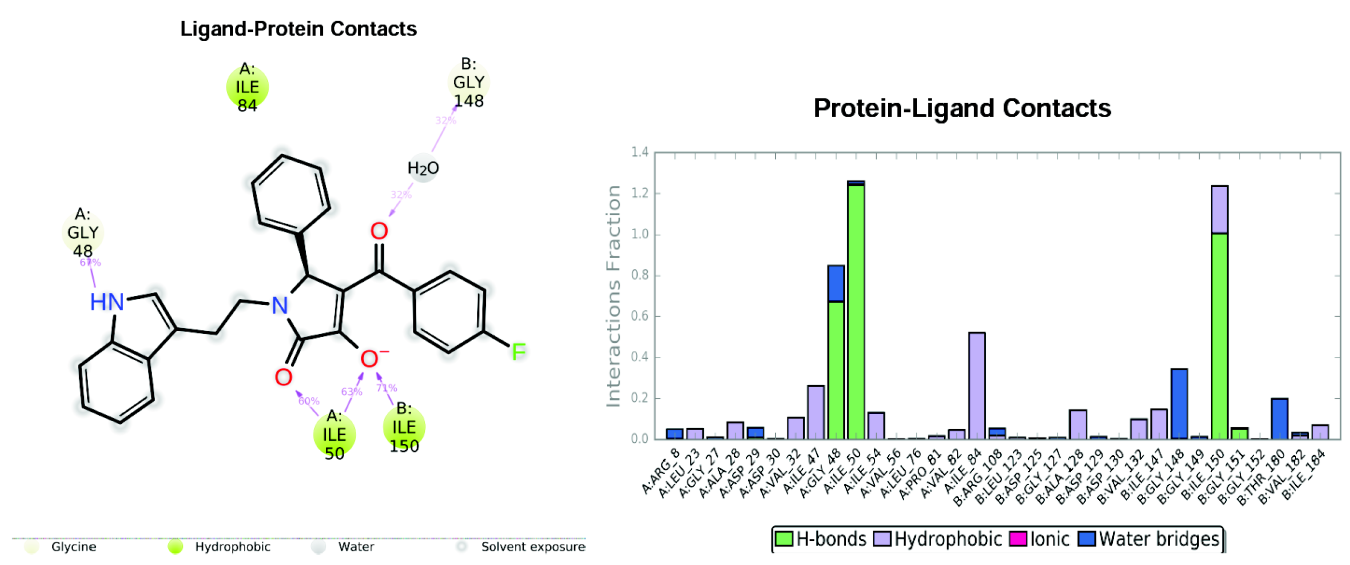

Supplement: Supplementary file 1 [file 1 › Figure_S3.png]

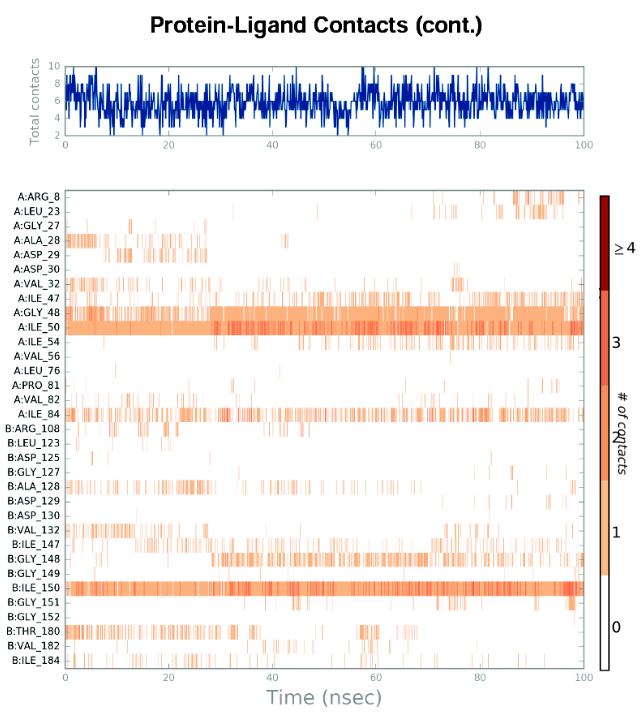

Supplement: Supplementary file 1 [file 1 › Figure_S4.png]
